# Supplementary material
Source: PubMed Central journal article supplement (PMC5017204)
Supplement: NIHMS782968-supplement-Supplemental.pdf [file NIHMS782968-supplement-Supplemental.pdf]

**Supporting information for:**

# Optimized Protocol To Analyze Changes in the Lipidome of Xenografts after Treatment with 2- Hydroxyoleic Acid

*Roberto Fernández,<sup>1</sup> Jone Garate,<sup>1</sup> Sergio Lage,<sup>1</sup> Silvia Terés,<sup>2</sup> Mónica Higuera,<sup>3</sup> Joan Bestard-Escalas,<sup>4</sup> M. Laura Martin,<sup>5</sup> Daniel H. López,<sup>4</sup> Francisca Guardiola-Serrano,<sup>3</sup> Pablo V. Escribá,<sup>3</sup> Gwendolyn Barceló-Coblijn<sup>4</sup> and José A. Fernández<sup>1\*</sup>*

<sup>1</sup>Dep. of Physical Chemistry, Fac. of Science and Technology, University of the Basque Country (UPV/EHU), Barrio Sarriena s/n, 48940, Spain.

<sup>2</sup>Unité de recherche Inserm 0916, Institut Européen de Chimie et Biologie (IECB)-INSERM, 2, rue Robert Escarpit, 33607, Pessac, France.

<sup>3</sup>Laboratory of Molecular and Cell Biomedicine, Department of Biology, University of the Balearic Islands, E-07122 Palma, Balearic Islands, Spain.

<sup>4</sup>Research Unit, Hospital Universitari Son Espases, Institut d'Investigació Sanitària de Palma (IdISPa), Ctra. Valldemossa 79, E-07010 Palma, Balearic Islands, Spain

<sup>5</sup>Laboratory of Signal Transduction, Memorial Sloan-Kettering Cancer Center, 415 East 68th Street, New York, NY 10065, USA.

\*José A. Fernández  
CD1.S1.10  
Dpto. de Química Física  
Fac. de Ciencia y Tecnología  
Universidad del País Vasco (UPV/EHU)  
Bº Sarriena s/n, 48940 Leioa  
Spain  
email: [josea.fernandez@ehu.es](mailto:josea.fernandez@ehu.es)  
Phone: +34946015387  
Fax: +34946013500

**Contents:**

Figure S1- Analysis of xenograft lipid extracts by HPTLC.

Figure S2- Representative average spectra over a section of control and treated xenografts

Figure S3- Scores and loadings plots of the ROIs of viable tissue

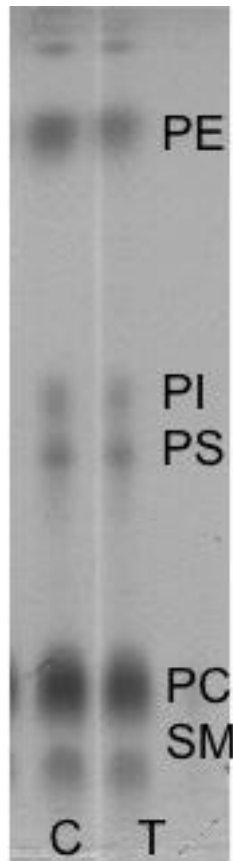

**Fig S1.** Analysis of xenograft lipid extracts by HPTLC.

Representative HPTLC of lipid extracts of xenografts generated in control (C) and 2-OHOA-treated immunodepressed mice (T,  $600 \text{ mg} \cdot \text{kg}^{-1} \cdot \text{d}^{-1}$ , 50 d). Phospholipids were separated using chloroform/methanol/acetic acid/water (55:37.5:3:2 by vol), which separates all major glycerophospholipids. Lipids were identified using commercially available standards (Larodan, Sweden). Plates were air-dried after development, sprayed with 8% (w/v)  $\text{H}_3\text{PO}_4$  containing 10% (w/v)  $\text{CuSO}_4$ , and charred at  $170^\circ\text{C}$  for 10 min. Bands were quantified by photodensitometry using Quantity One software (Bio-Rad, Barcelona, Spain).

PC: phosphatidylcholine; PE: phosphatidylethanolamine; PI: phosphatidylinositol, PS: phosphatidylserine; SM: sphingomyelin

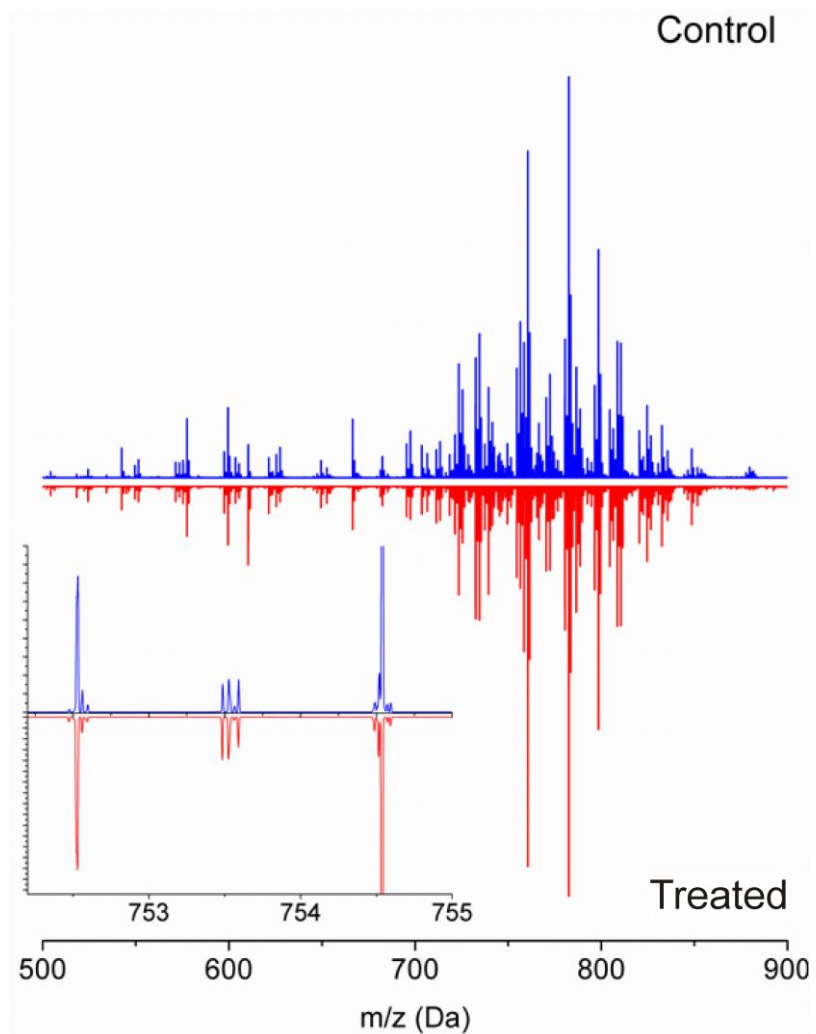

**Fig. S2.** Representative average spectra over a section of control (blue) and treated (red) xenografts. The insert shows a zoom over a random section of the spectra to demonstrate the similarity between both traces. Such similarity clearly shows why an image technique was required to unravel the changes in the lipid profile due to the treatment.

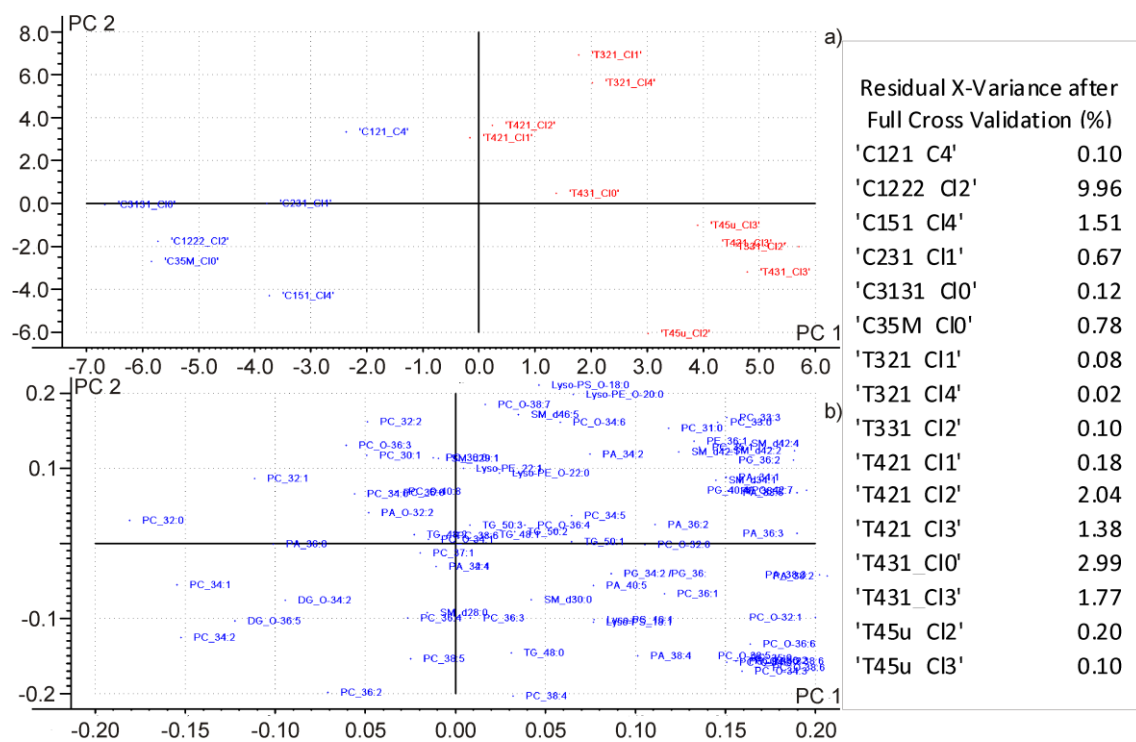

**Fig. S3.** (a) Scores plot of the ROIs of viable tissue. Control samples (left) and treated samples (right) were well classified along the PC 1. (b) Loadings plot. The residual variance is also included.
